# Supplementary material for: Evaluation and application of summary statistic imputation to discover new height-associated loci
Source: PubMed Central journal article supplement (PMC5983877; doi:10.1371/journal.pgen.1007371), 2018-05-21

Number of SNVs imputed

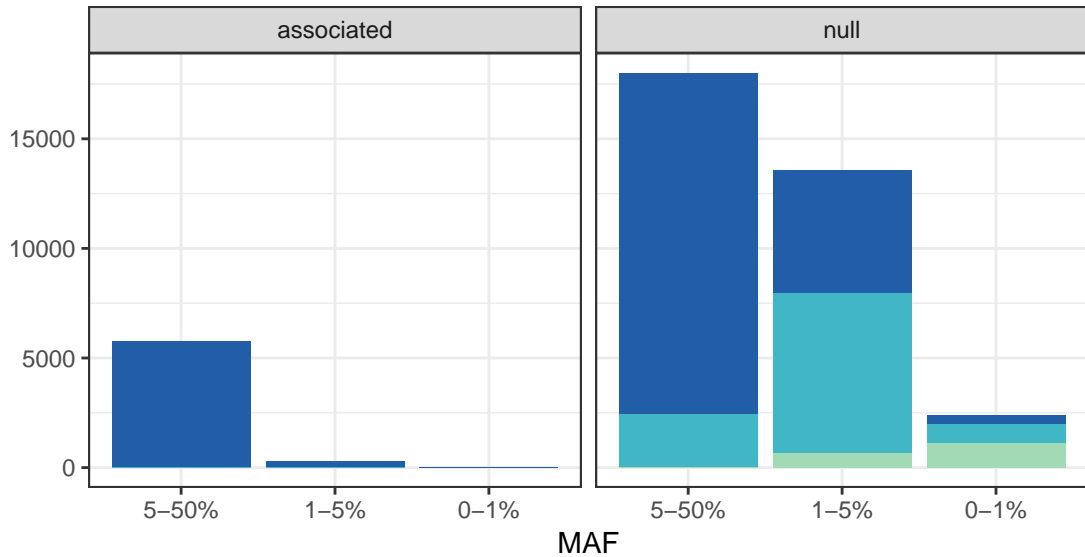

Supplement: pgen.1007371.s001.pdf [file pgen.1007371.s001.pdf]
