# Supplementary material for: Evaluation and application of summary statistic imputation to discover new height-associated loci
Source: PubMed Central journal article supplement (PMC5983877; doi:10.1371/journal.pgen.1007371), 2018-05-21
Supplement: pgen.1007371.s021.pdf [file pgen.1007371.s021.pdf]

# Evaluation and application of summary statistic imputation to discover new height-associated loci

Sina Rüeger, Aaron McDaid and Zoltán Kutalik

March 13, 2018

## S3 Appendix: Accounting for varying sample size and missingness

All previously published methods assume that all effect estimates are based on the same set of  $N$  individuals. This assumption does not always hold, for example when meta-analysing studies use different genotyping chips or different imputation panels. As a result, the covariance between effect estimates will change. In the extreme case when effect estimates are computed in two non-overlapping samples, the correlation will be zero even if there is very high LD between the two SNVs.

$\mathbf{C}$ , as defined above, is an estimate of  $\Gamma_{\mathcal{M}\mathcal{M}}$ , which is the correlation matrix due to LD among the tag SNVs in the current region. We define  $\mathbf{N}$  as a vector recording the sample size of each tag SNV,  $N_{max}$  as the maximum in  $\mathbf{N}$ , and assume that every tag SNV  $k$  the sample of individuals is a subset of a complete sample of  $N_{max}$  individuals. Unlike the situation where the sample size is the same for all tag SNVs, varying sample size requires to first impute the Z-statistic  $z$  before computing the standardised effect size  $a$ . For each tag SNV  $k$ , we have observed a ‘partial’ Z-statistic,  $z_k^\circ$ , computed over the  $N_k$  individuals. For a SNV  $u$ , our goal is to impute a ‘complete’ Z-statistic,  $z_u$ , estimated from a complete sample of  $N_{max}$  people. In other words, for any SNV  $u$  we wish to impute  $z_u|z_{\mathcal{M}}^\circ$ .

To perform imputation, we require the correlation between any target complete Z-statistic,  $z_u$ , and any observed partial Z-statistic,  $z_k^\circ$ , (with  $k \in \mathcal{M}$ ),

$$\mathbf{d}_k := \text{Cor}[z_u, z_k^\circ] = c_{uk} \sqrt{\frac{N_k}{N_{max}}}$$

where  $c_{uk} = \widehat{\Gamma}_{uk}$  is our estimate of the LD-correlation between the two SNVs. We also require the correlations among the partial Z-statistics,  $z_{\mathcal{M}}^\circ$ . For any two SNVs  $k, l \in \mathcal{M}$ , the correlation of their observed partial Z-statistics can be calculated as:

$$\text{Cor}[z_k^\circ, z_l^\circ] = c_{kl} \frac{N_{k \cap l}}{\sqrt{N_k N_l}}$$

29 where  $N_k$  and  $N_l$  are the number of individuals for which SNV  $k$  and  $l$  are available,  
 30 respectively, and  $N_{k \cap l}$  is the number of individuals that contributed to the calculation  
 31 of the effect estimates for both SNVs  $k$  and  $l$ . The estimation of  $N_{k \cap l}$  is discussed in the  
 32 next section.

33 We can use this to adjust the correlation matrices  $\mathbf{C}$  and  $\mathbf{c}$ , respectively  $\mathbf{D}$  and  $\mathbf{d}$ , the  
 34 elements of which are

$$\mathbf{D}_{k,l} = c_{kl} \delta_{kl},$$

35 By defining  $\delta_{kl} := \frac{N_{k \cap l}}{\sqrt{N_k N_l}}$ , we can calculate the adjusted (estimated) correlation matrix  
 36  $\mathbf{D}$ , where each element is calculated as follows:

$$\mathbf{D}_{kl} = c_{kl} \delta_{kl}.$$

37  $\mathbf{D}$  and  $\mathbf{d}$  are therefore defined as adjusted versions of  $\mathbf{C}$  and  $\mathbf{c}$  respectively.  $\mathbf{C}$  and  $\mathbf{D}$   
 38 are  $q \times q$  matrices, where  $q$  is the number of tag SNVs, and they are recomputed in each  
 39 region.  $\mathbf{c}$  and  $\mathbf{d}$  are vectors of length  $q$ , and are recomputed for each target SNV  $u$ .

40 The conditional distribution is

$$(z_u - \mathbb{E}[z_u]) | \mathbf{z}_{\mathcal{M}}^\circ \sim \mathcal{N}(\mathbf{d}' \mathbf{D}^{-1} (\mathbf{z}_{\mathcal{M}}^\circ - \mathbb{E}[\mathbf{z}_{\mathcal{M}}^\circ]), 1 - \mathbf{d}' \mathbf{D}^{-1} \mathbf{d}).$$

41 Applying the simplifying assumption that  $\mathbb{E}[z_u] \approx \mathbf{d}' \mathbf{D}^{-1} \mathbb{E}[\mathbf{z}_{\mathcal{M}}^\circ]$ , similar to the assump-  
 42 tion that took us from 1 to 2,

$$z_u | \mathbf{z}_{\mathcal{M}}^\circ \sim \mathcal{N}(\mathbf{d}' \mathbf{D}^{-1} \mathbf{z}_{\mathcal{M}}^\circ, 1 - \mathbf{d}' \mathbf{D}^{-1} \mathbf{d})$$

43 and therefore we impute  $z_u | \mathbf{z}_{\mathcal{M}}^\circ$  as

$$\hat{z}_u = \mathbb{E}[z_u | \mathbf{z}_{\mathcal{M}}^\circ] = \mathbf{d}' \mathbf{D}^{-1} \mathbf{z}_{\mathcal{M}}^\circ. \quad (\text{S1})$$

44 In order to convert  $\hat{z}_u$  into the corresponding estimate of the standardised effect, we  
 45 consider the (hypothetical) process of imputing each individual genotype.

46 If we had the individual-level genetic data, with  $j$  to index individuals, each element  
 47 of the  $N_{max}$ -element vector  $\mathbf{g}^u$  for SNV  $u$  could be imputed using genotypes from the  
 48 tag SNVs  $G^{\mathcal{M}}$  via  $\hat{g}_j^u = \mathbf{c}'_{\mathcal{M}(j),u} \mathbf{C}_{\mathcal{M}(j),\mathcal{M}(j)}^{-1} G_j^{\mathcal{M}}$ , where the set  $\mathcal{M}(j)$  can be different for  
 49 each individual as each individual has a different set of tagged SNVs. The corresponding  
 50 standardised effect estimate, based on linear regression, would be

$$\hat{a}_u = \mathbb{E}[a_u | \mathbf{a}_{\mathcal{M}}] = \frac{(\hat{\mathbf{g}}^u)' \mathbf{y}}{(\hat{\mathbf{g}}^u)' \hat{\mathbf{g}}^u}$$

51 The denominator of this is  $(\hat{\mathbf{g}}^u)' \hat{\mathbf{g}}^u = N_{max} \mathbf{d}' \mathbf{D}^{-1} \mathbf{d}$ , as opposed to  $(\mathbf{g}^u)' \mathbf{g}^u = N_{max}$ , and

52 we define the *effective sample size* as  $N_{max}\mathbf{d}'\mathbf{D}^{-1}\mathbf{d}$ . Therefore, even though we do not  
 53 have the per-individual genetic data, we can impute the standardised effect  $a_u$  via

$$\hat{a}_u = \mathbb{E}[a_u | \mathbf{z}_{\mathcal{M}}^{\circ}] = \frac{\hat{z}_u}{\sqrt{N_{max}\mathbf{d}'\mathbf{D}^{-1}\mathbf{d}}}. \quad (\text{S2})$$

54 **Estimating overlap  $N_{k \cap l}$  and  $\delta$**

55 Typically, we do not know the details of the exact sample overlap for every pair of SNVs,  
 56  $n_{k \cap l}$ , and instead simply know  $N_{max}$  and the vector  $\mathbf{N}$ . Therefore, we must derive the  
 57 sample overlap based on assumptions about the dependence structure of missingness.

If each SNV has a corresponding binary missingness vector, the correlation between these missingness vectors will be maximised when the sample overlap is at its maximum,  $N_{k \cap l} = \min(N_k, N_l)$ . To enable the *dependent* approach, we construct a  $\mathbf{D}$  matrix by replacing  $N_{k \cap l}$  with  $\min(N_k, N_l)$ ,

$$\mathbf{D}_{kl}^{(dep)} = \mathbf{C}_{kl}\hat{\delta}_{kl}^{(dep)} = \mathbf{C}_{kl} \min\left(\frac{\sqrt{N_k}}{\sqrt{N_l}}, \frac{\sqrt{N_l}}{\sqrt{N_k}}\right). \quad (\text{S3})$$

58 and plug  $\mathbf{D}^{(dep)}$  into Eqs. (S1) and (S2).

If the missingness vectors are *independent* of each other, the expected overlap can be estimated as

$$\mathbf{D}_{kl}^{(ind)} = \mathbf{C}_{kl}\hat{\delta}_{kl}^{(ind)} = \mathbf{C}_{kl} \frac{\sqrt{N_k N_l}}{N_{max}}. \quad (\text{S4})$$
